# Supplementary material
Source: PubMed Central journal article supplement (PMC9115583)
Supplement: NIHMS1802367-supplement-1.pdf [file NIHMS1802367-supplement-1.pdf]

**Supplementary Table:** Percentages of antimicrobial resistance by type of *H.pylori* treatment regimens and eradication test results.

| Treatment Regimen*/Eradication test result           | Number. of strains | Percent resistance |      |     |     |      |
|------------------------------------------------------|--------------------|--------------------|------|-----|-----|------|
|                                                      |                    | Cla                | Met  | Tet | Amo | Rif  |
| <b>PPI-Tetracycline-Metronidazole-Bismuth</b>        |                    |                    |      |     |     |      |
| <b>Success</b>                                       | 71                 | 26.8               | 29.6 | 1.4 | 1.4 | 0    |
| <b>Failure</b>                                       | 8                  | 37.5               | 50.0 | 0   | 0   | 0    |
| <b>PPI-Doxycycline-Metronidazole-Bismuth</b>         |                    |                    |      |     |     |      |
| <b>Success</b>                                       | 15                 | 26.7               | 46.7 | 0   | 0   | 0    |
| <b>Failure</b>                                       | 3                  | 33.3               | 0    | 0   | 0   | 0    |
| <b>PPI-Clarithromycin- Amoxicillin-Metronidazole</b> |                    |                    |      |     |     |      |
| <b>Success</b>                                       | 3                  | 0                  | 0    | 0   | 0   | 33.3 |
| <b>Failure</b>                                       | 1                  | 0                  | 100  | 0   | 100 | 0    |
| <b>PPI-Clarithromycin- Amoxicillin</b>               |                    |                    |      |     |     |      |
| <b>Success</b>                                       | 36                 | 11.1               | 33.3 | 0   | 0   | 0    |
| <b>Failure</b>                                       | 26                 | 57.7               | 38.5 | 0   | 0   | 0    |
| <b>PPI- Clarithromycin- Metronidazole</b>            |                    |                    |      |     |     |      |
| <b>Success</b>                                       | 11                 | 27.3               | 36.4 | 0   | 0   | 0    |
| <b>Failure</b>                                       | 7                  | 57.1               | 28.6 | 0   | 0   | 0    |
| <b>PPI-Amoxicillin-Metronidazole</b>                 |                    |                    |      |     |     |      |
| <b>Success</b>                                       | 4                  | 25.0               | 25.0 | 0   | 0   | 0    |
| <b>Failure</b>                                       | 0                  | N/A                | N/A  | N/A | N/A | N/A  |
| <b>PPI-Rifabutin-Amoxicillin</b>                     |                    |                    |      |     |     |      |
| <b>Success</b>                                       | 1                  | 100                | 0    | 0   | 0   | 0    |
| <b>Failure</b>                                       | 1                  | 100                | 0    | 0   | 0   | 0    |

PPI: proton pump inhibitor, Cla: Clarithromycin, Met: Metronidazole, Tet:Tetracycline, Amo: Amoxicillin, Rif: Rifabutin

\*Doses and frequencies of medications for all treatment regimens followed the American College of Gastroenterology 2017 clinical guidelines.<sup>2</sup> For the PPI-clarithromycin-amoxicillin regimen, the PPI dose was either standard or double and for the PPI-bismuth-tetracycline-metronidazole regimen, the metronidazole dose varied from 1,000 mg to 2,000 mg daily.
